# Supplementary material for: Association between LCE gene polymorphisms and psoriasis vulgaris among Mongolians from Inner Mongolia
Source: Springer Nature journal article supplement (doi:10.1007/s00403-018-1813-0), 2018-02-03
Supplement: MOESM1 [file 15436962]

**Supplementary data. LDR probe sequence**

| Probe name        | Probe sequence (5' - 3')                                                                          | Product length |
|-------------------|---------------------------------------------------------------------------------------------------|----------------|
| rs6701216_modify  | P-ATCCCCTCTATGCACCAAAAATACTTTTTTTTTTTTTTTTTTTT<br>TTTTTTTTTTTTTTTTTTTTTTTTTTTTTTTTTTTTTTTTTTT-FAM |                |
| rs6701216_C       | TTTTTTTTTTTTTTTTTTTTTTTTTTTTTTTTTTTTTTTTTTTTTTT<br>TTTTCTAGAGCCAGGGCACCTGAGTTCAG                  | 154            |
| rs6701216_T       | TTTTTTTTTTTTTTTTTTTTTTTTTTTTTTTTTTTTTTTTTTTTTTT<br>TTTTTTCTAGAGCCAGGGCACCTGAGTTCAA                | 156            |
| rs4112788_modify  | P-TCTTTTAATTGTAGTCTAAAGGTTTTTTTTTTTTTTTTTTTTT<br>TTTTTTTTTTTTTTTTTTTTTTTTTTTTTTTTTTTTTTTTTTT-FAM  |                |
| rs4112788_C       | TTTTTTTTTTTTTTTTTTTTTTTTTTTTTTTTTTTTTTTTTTTTTTT<br>TTTTTTTTTTTTTCTGAGGCCATGTTTTTCTTTACCCG         | 162            |
| rs4112788_T       | TTTTTTTTTTTTTTTTTTTTTTTTTTTTTTTTTTTTTTTTTTTTTTT<br>TTTTTTTTTTTTTTTCTGAGGCCATGTTTTTCTTTACCCA       | 164            |
| rs12023196_modify | P-TAGGTCCCGTGACAGGTGGTAACTGTTTTTTTTTTTTTTTTTT<br>TTTTTTTTTTTTTTTTTTTTTTTTTTTTTTTTTTTTTTTTTTT-FAM  |                |
| rs12023196_C      | TTTTTTTTTTTTTTTTTTTTTTTTTTTTTTTTTTTTTTTTTTTTTTT<br>TTTTTTTTTTTTTTTTTTGAGGACTTGCCCTCCTGACACCCACG   | 166            |
